# Supplementary material
Source: Springer Nature journal article supplement (https://www.springermedizin.de/resource/supplementary/12939_2013_366_MOESM2_ESM.pdf/9550986)

## Characteristics of study variables in villages with and without SHG

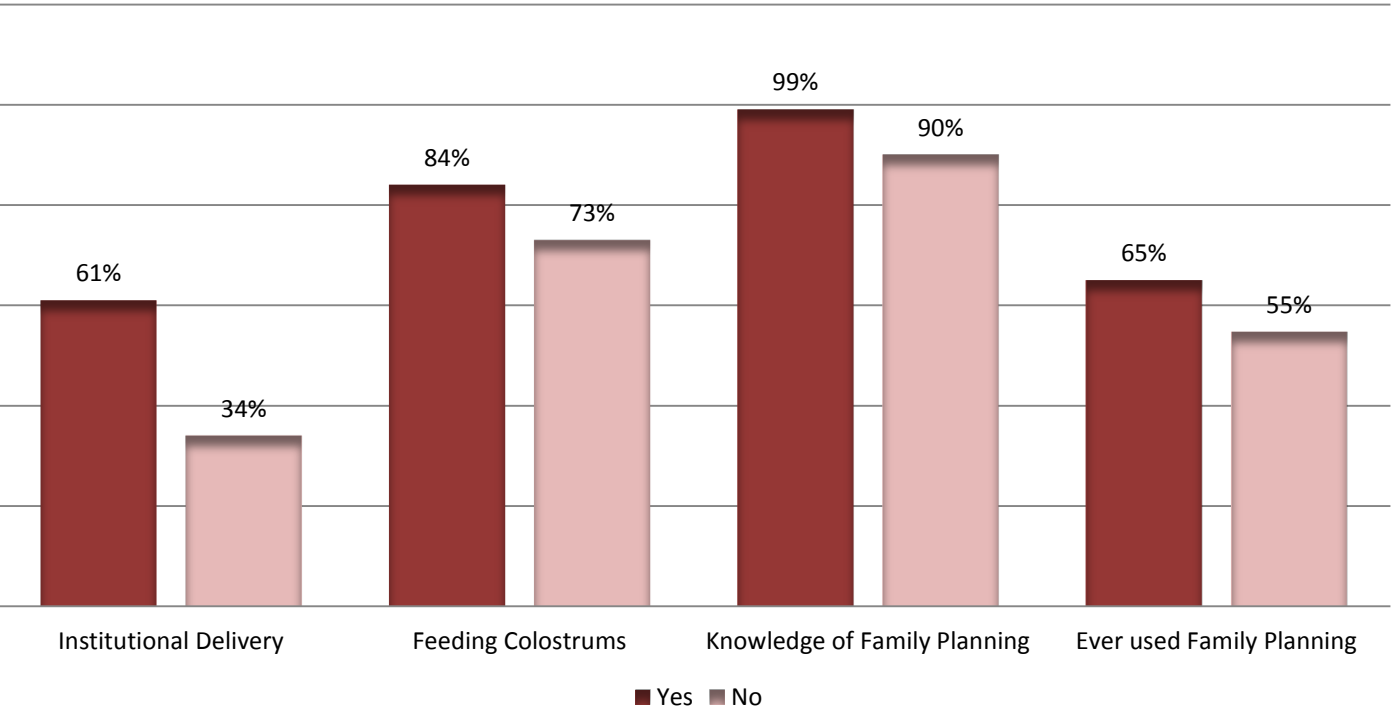

Supplement: MOESM2 [file 9550986]
